# Supplementary material for: PLK4 self-phosphorylation drives the selection of a single site for procentriole assembly
Source: PubMed Central journal article supplement — J Cell Biol. 2023 Sep 29;222(12):e202301069. doi: 10.1083/jcb.202301069 (PMC10541313; doi:10.1083/jcb.202301069), 2023-09-29

**Figure S7B**

Original Gel

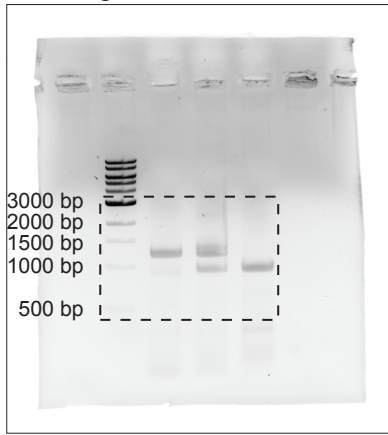

**Figure S7D**

Original HA Blot (max exposure + overlay)

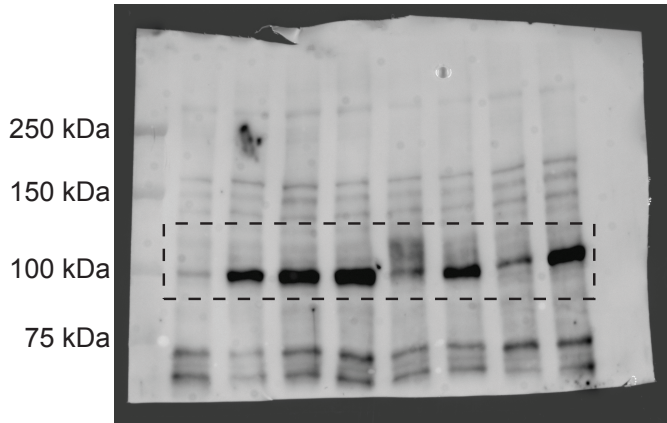

Original HA Blot (lowest exposure)

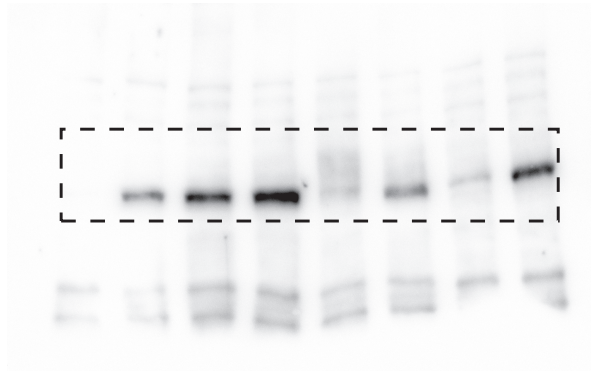

Original Vinculin Blot (max exposure + overlay)

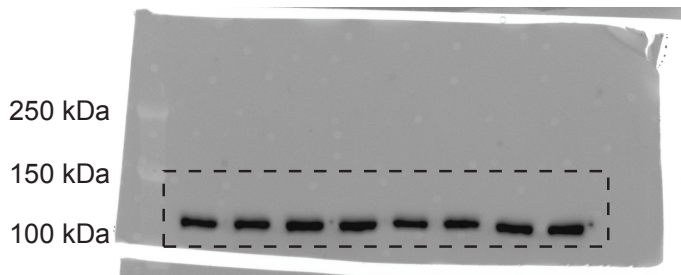

Original Vinculin Blot (lowest exposure)

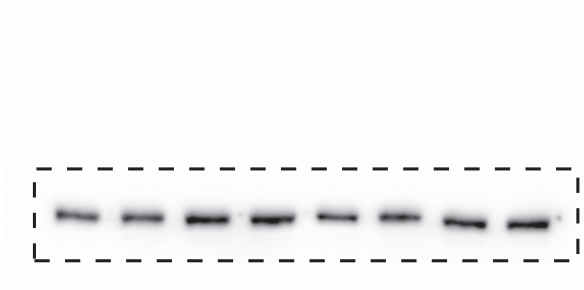

**Figure S7E**

Original HA Blot (max exposure + overlay)

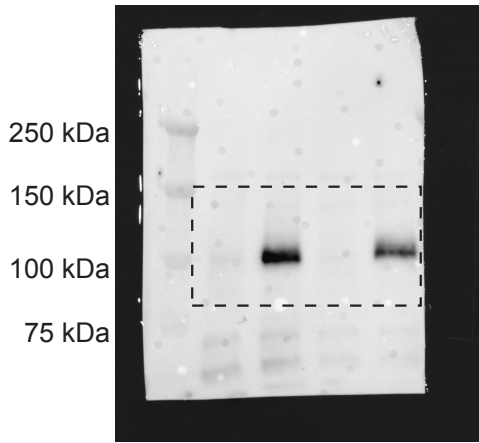

Original HA Blot (lowest exposure)

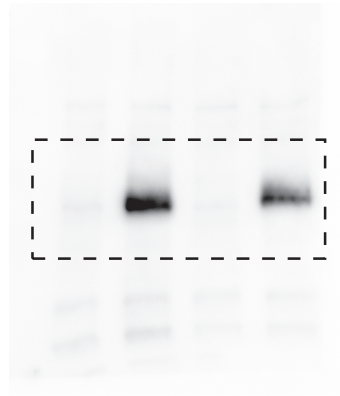

Original Vinculin Blot (max exposure + overlay)

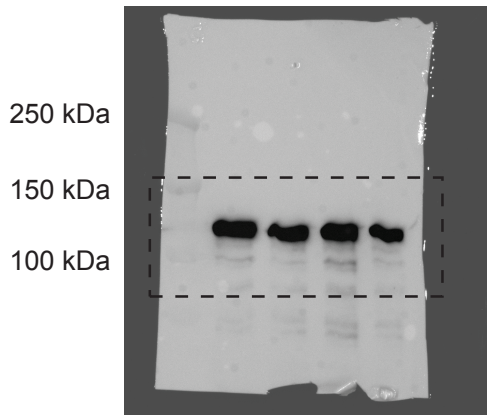

Original Vinculin Blot (lowest exposure)

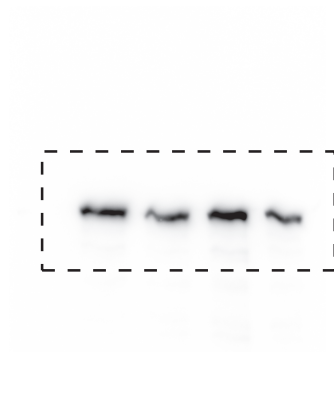

Supplement: JCB_202301069_SourceDataFS7.pdf [file JCB_202301069_SourceDataFS7.pdf]
